# Supplementary material for: SRSF10-mediated IL1RAP alternative splicing regulates cervical cancer oncogenesis via mIL1RAP-NF-κB-CD47 axis
Source: PubMed Central journal article supplement — Oncogene. 2018 Feb 12;37(18):2394–409. doi: 10.1038/s41388-017-0119-6 (PMC5931977; doi:10.1038/s41388-017-0119-6), 2018-02-12
Supplement: 41388_2017_119_MOESM2_ESM.pdf [file 41388_2017_119_MOESM2_ESM.pdf]

**Supplementary Table 1. The differentially expressed genes in AS pathway in CC**

| <b>Gene</b>   | <b>Caski-NC</b> | <b>Caski-si RNA</b> | <b>Ms751-NC</b> | <b>Ms751-siRNA</b> |
|---------------|-----------------|---------------------|-----------------|--------------------|
| ACIN1         | 1213.21         | 1057.72             | 1997.32         | 1085.79            |
| AQR           | 61.01           | 51.80               | 171.57          | 36.03              |
| BCAS2         | 1432.93         | 746.15              | 1347.12         | 608.66             |
| BUB3          | 2933.97         | 2151.46             | 3300.73         | 1666.47            |
| BUD31         | 5673.95         | 4259.57             | 5070.61         | 3189.58            |
| C9orf78       | 1402.55         | 1404.49             | 1843.56         | 975.06             |
| CACTIN        | 3588.12         | 3937.86             | 2412.18         | 1779.06            |
| CD2BP2        | 503.78          | 761.79              | 776.43          | 560.62             |
| CDC40         | 246.15          | 153.54              | 244.71          | 259.32             |
| CDC5L         | 650.12          | 317.49              | 809.71          | 209.89             |
| CHERP         | 3245.87         | 2668.85             | 2069.03         | 1399.02            |
| CRNKL1        | 49.81           | 40.52               | 98.71           | 33.59              |
| CTNBL1        | 1733.74         | 1269.76             | 569.34          | 367.97             |
| CWC15         | 5608.57         | 5182.89             | 2856.14         | 1256.28            |
| CXorf56       | 361.77          | 330.44              | 342.36          | 224.17             |
| DDX23         | 3397.23         | 3141.90             | 9730.73         | 6595.72            |
| DDX35,(DHX35) | 3266.16         | 2324.62             | 1593.69         | 804.77             |
| DDX41         | 3673.36         | 3825.66             | 2597.95         | 2054.95            |
| DDX46         | 153.14          | 63.39               | 395.12          | 81.75              |
| DDX15         | 1075.34         | 539.52              | 2050.83         | 402.18             |
| DDX8          | 1455.88         | 1156.80             | 1730.16         | 1001.16            |
| EFTUD2        | 29702.91        | 27308.35            | 27383.02        | 21561.70           |
| FAM50A        | 5346.54         | 5367.47             | 2896.43         | 2552.26            |
| HNRNPA0       | 3291.21         | 4370.67             | 6703.09         | 5484.26            |
| HNRNPA1       | 30618.06        | 15532.09            | 46363.62        | 19625.74           |
| HNRNPA2B1     | 5879.85         | 2679.79             | 6354.45         | 2052.24            |
| HNRNPA3       | 25448.61        | 11710.04            | 34419.95        | 14219.68           |
| HNRNPC        | 50760.55        | 36422.11            | 48610.31        | 31542.01           |
| HNRNPD        | 20924.58        | 10992.29            | 21572.76        | 13003.76           |
| HNRNPF        | 5326.10         | 3526.99             | 5488.27         | 3320.44            |
| HNRNPH1       | 3846.41         | 2008.85             | 4633.39         | 2009.24            |
| HNRNPH3       | 1528.72         | 893.29              | 1611.37         | 683.89             |
| HNRNPK        | 4038.52         | 2539.92             | 4578.68         | 2087.32            |
| HNRNPL        | 6872.23         | 5362.76             | 6379.18         | 4532.30            |
| HNRNPM        | 17899.96        | 12458.20            | 19750.73        | 10244.01           |
| HNRNPR        | 1396.88         | 526.20              | 2193.02         | 722.26             |
| HNRNPU        | 4332.28         | 2078.48             | 5585.10         | 2474.48            |
| HNRNPUL1      | 9393.89         | 5306.28             | 8986.04         | 5462.41            |
| HSPA4         | 10533.12        | 6209.26             | 6209.26         | 5392.35            |
| HSPA5         | 3623.36         | 3304.37             | 2767.52         | 1440.69            |
| HSPA8         | 74251.02        | 83310.25            | 117109.40       | 57894.33           |
| HTATSF1       | 3337.25         | 1716.41             | 3824.14         | 1535.22            |
| HTRA2         | 3993.48         | 3191.34             | 1945.56         | 1800.14            |
| IK            | 1684.68         | 1023.86             | 3993.90         | 1225.33            |

|          |          |          |          |          |
|----------|----------|----------|----------|----------|
| ISY1     | 1041.02  | 1058.21  | 1360.90  | 870.78   |
| LSM2     | 5955.12  | 4257.96  | 5506.15  | 5039.44  |
| LSM3     | 17802.57 | 11573.29 | 17623.51 | 14413.42 |
| LSM4     | 16088.83 | 12577.94 | 12492.01 | 10145.30 |
| LSM6     | 6360.16  | 2728.42  | 2660.91  | 1848.74  |
| LSM7     | 44792.60 | 39114.64 | 23520.26 | 18306.24 |
| LSM8     | 9782.32  | 6801.21  | 5845.64  | 3907.64  |
| MAGOH    | 2876.20  | 2383.42  | 5435.29  | 3116.78  |
| MATR3    | 379.25   | 254.44   | 907.72   | 243.16   |
| NAA38    | 9782.32  | 6801.21  | 5845.64  | 3907.64  |
| NFATC2IP | 332.41   | 234.67   | 300.93   | 145.67   |
| NHP2L1   | 32776.96 | 31309.89 | 21019.01 | 13714.85 |
| NOSIP    | 28742.67 | 32265.47 | 18938.90 | 18872.72 |
| PABPN1   | 18440.16 | 14875.40 | 22559.38 | 14765.81 |
| PHF5A    | 1436.57  | 1326.60  | 1037.66  | 695.62   |
| PLRG1    | 537.90   | 468.27   | 497.28   | 293.32   |
| PPIE     | 1979.68  | 1421.20  | 1328.73  | 971.30   |
| PPIG     | 291.10   | 145.41   | 273.17   | 69.10    |
| PPIH     | 519.92   | 290.33   | 657.31   | 412.97   |
| PPIL1    | 7741.08  | 5984.06  | 5847.17  | 2329.42  |
| PPIL2    | 573.91   | 722.52   | 891.71   | 683.33   |
| PPIL3    | 1373.00  | 870.90   | 925.20   | 377.73   |
| PPWD1    | 181.26   | 65.53    | 189.00   | 45.00    |
| PQBP1    | 2248.22  | 2813.39  | 2871.82  | 2154.50  |
| PRPF18   | 264.07   | 168.45   | 391.55   | 138.53   |
| PRPF19   | 376.90   | 427.05   | 488.00   | 517.62   |
| PRPF3    | 374.30   | 235.55   | 483.68   | 215.39   |
| PRPF31   | 14369.95 | 15405.17 | 13908.31 | 9544.51  |
| PRPF4    | 3356.02  | 1497.45  | 3218.95  | 1590.25  |
| PRPF4B   | 262.34   | 174.73   | 299.78   | 109.31   |
| PRPF6    | 6828.62  | 7323.14  | 5482.45  | 4591.98  |
| PRPF8    | 7900.50  | 7646.97  | 10514.35 | 6786.04  |
| PTBP1    | 408.68   | 364.47   | 387.63   | 241.59   |
| PUF60    | 20288.77 | 20138.20 | 12532.27 | 10991.26 |
| RALY     | 5512.14  | 4876.69  | 4020.48  | 3286.08  |
| RBM17    | 1297.96  | 720.43   | 2143.31  | 945.39   |
| RBM22    | 1393.41  | 1203.06  | 1455.60  | 671.21   |
| RBM8A    | 30109.60 | 23153.38 | 31598.59 | 20165.27 |
| RBMX     | 15378.45 | 9916.65  | 15251.81 | 6857.54  |
| SART1    | 2900.48  | 2962.14  | 2730.38  | 2122.77  |
| SF3A1    | 6247.43  | 6026.31  | 6617.57  | 5283.30  |
| SF3A2    | 4222.09  | 5391.03  | 3932.84  | 3685.08  |
| SF3A3    | 3572.09  | 2849.09  | 6360.50  | 2964.78  |
| SF3B1    | 1709.37  | 882.23   | 5714.05  | 1325.81  |
| SF3B14   | 14774.49 | 11697.05 | 11973.09 | 8464.68  |
| SF3B2    | 11250.44 | 11250.44 | 12991.90 | 9037.02  |
| SF3B3    | 6330.39  | 5506.65  | 6308.26  | 4171.14  |

|          |          |          |          |          |
|----------|----------|----------|----------|----------|
| SF3B4    | 96.77    | 109.92   | 145.56   | 97.82    |
| SLU7     | 528.17   | 328.71   | 1027.84  | 350.44   |
| SMNDC1   | 5111.85  | 3125.45  | 4688.86  | 2224.08  |
| SNRNP200 | 9614.86  | 8085.63  | 11267.67 | 6191.32  |
| SNRNP27  | 2654.89  | 2057.05  | 2287.81  | 1308.44  |
| SNRNP40  | 1156.67  | 684.85   | 1160.51  | 843.68   |
| SNRNP70  | 34271.70 | 24363.63 | 30546.64 | 23427.12 |
| SNRPA    | 4834.20  | 3194.15  | 4375.89  | 3237.95  |
| SNRPA1   | 1516.05  | 686.97   | 5603.53  | 2819.52  |
| SNRPB    | 20983.50 | 13005.16 | 23896.36 | 18731.84 |
| SNRPB2   | 1397.44  | 1318.26  | 1831.59  | 865.17   |
| SNRPC    | 47249.11 | 41026.97 | 44734.29 | 28926.55 |
| SNRPD1   | 22546.73 | 12523.70 | 32178.98 | 19065.82 |
| SNRPD2   | 45667.27 | 48627.74 | 40576.07 | 31320.33 |
| SNRPD3   | 11549.86 | 7817.71  | 23719.32 | 12675.03 |
| SNRPE    | 10615.76 | 8592.50  | 14246.03 | 8754.05  |
| SNRPF    | 44792.39 | 31666.00 | 48785.60 | 36565.53 |
| SNRPG    | 29247.19 | 18456.79 | 31132.64 | 24287.71 |
| SNW1     | 2277.30  | 1499.47  | 2104.65  | 658.55   |
| SRP40    | 6799.37  | 7862.15  | 6591.98  | 3063.60  |
| SRP54    | 315.76   | 138.78   | 251.38   | 74.96    |
| SRRM1    | 3784.05  | 2435.71  | 2644.33  | 1419.40  |
| SRSF1    | 3511.24  | 1776.80  | 4701.21  | 1757.34  |
| SRSF12   | 42.06    | 26.08    | 32.03    | 25.29    |
| SRSF2    | 13044.03 | 8691.06  | 14542.01 | 6392.61  |
| SRSF3    | 17378.87 | 8301.04  | 22107.44 | 9135.91  |
| SRSF4    | 11205.94 | 5612.05  | 9275.51  | 5019.03  |
| SRSF6    | 1523.13  | 1206.27  | 978.74   | 586.34   |
| SRSF7    | 7064.08  | 3312.23  | 6369.03  | 2709.40  |
| SRSF9    | 6051.84  | 4869.39  | 7962.90  | 5519.32  |
| SRSF10   | 1263.01  | 350.42   | 2782.27  | 909.88   |
| SYF2     | 388.33   | 352.26   | 935.71   | 369.16   |
| SYNCRIP  | 2583.47  | 1504.25  | 5606.48  | 2037.82  |
| TXNL4A   | 20640.82 | 16536.51 | 18423.99 | 13949.38 |
| U2AF1    | 45482.08 | 40225.25 | 41046.59 | 32164.90 |
| U2AF2    | 1108.48  | 887.45   | 2158.94  | 1591.92  |
| U2SURP   | 174.83   | 97.30    | 326.58   | 77.28    |
| USP39    | 24928.53 | 14711.32 | 30893.50 | 19005.54 |
| WBP11    | 3607.20  | 2571.73  | 5386.06  | 2411.04  |
| WDR83    | 1169.65  | 997.20   | 565.04   | 468.69   |
| XAB2     | 206.03   | 136.78   | 72.70    | 62.23    |
| YBX1     | 94493.80 | 76303.94 | 80301.72 | 39785.26 |
| ZMAT2    | 3316.45  | 2626.09  | 4624.03  | 2460.07  |
